# Supplementary material for: Neo-antigens predicted by tumor genome meta-analysis correlate with increased patient survival
Source: HighWire-hosted journal article supplement (doi:10.1101/gr.165985.113), 2014-04-29
Supplement: Supplemental_Figures.pdf [file Supplemental_Figures.pdf]

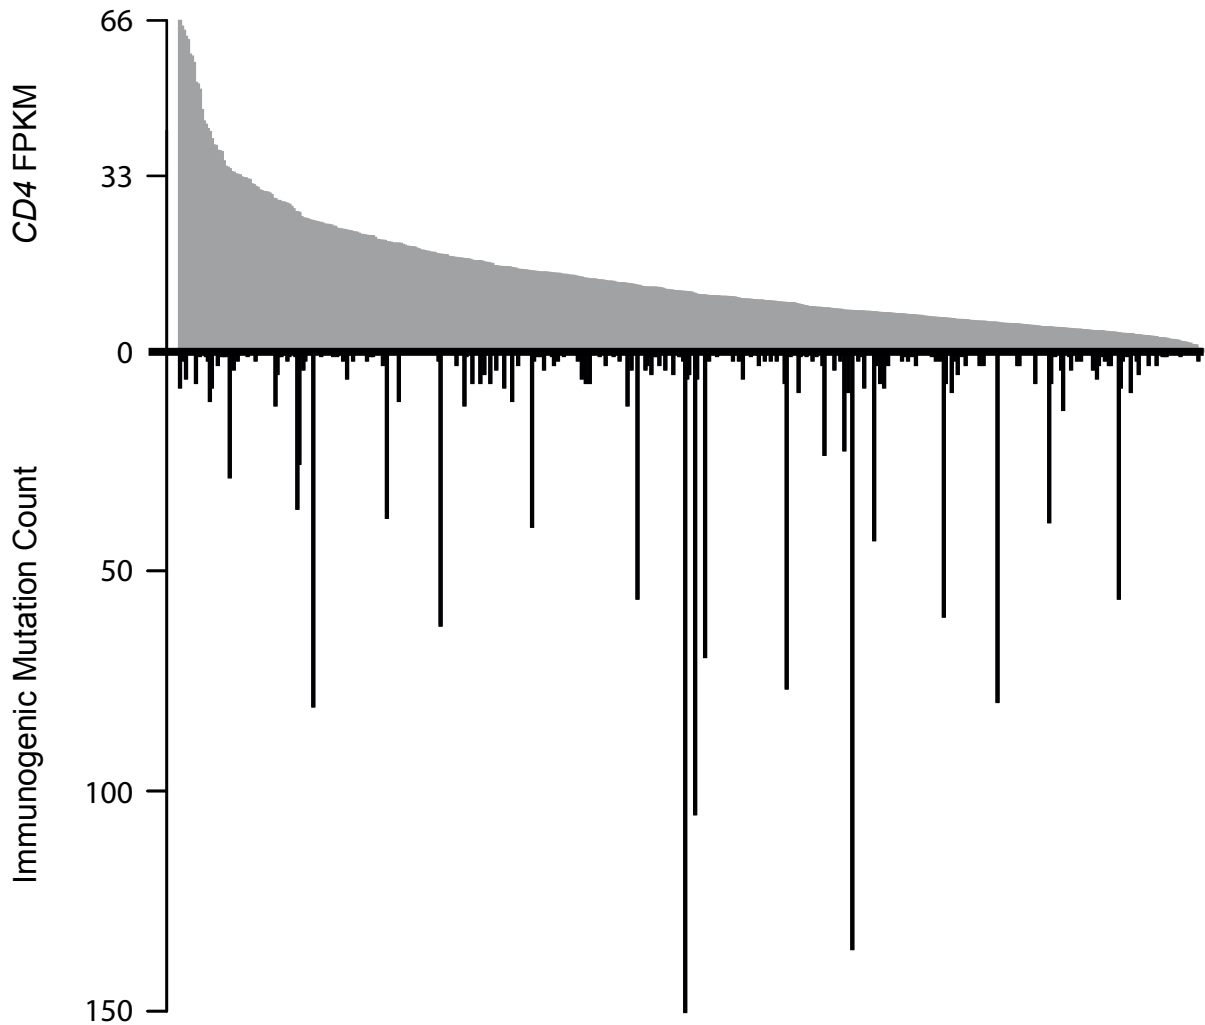

**Supplementary Figure 1** Skew plot of *CD4* expression and predicted immunogenic mutations. Patients were ordered along the x-axis according to their *CD4* expression. Each patient's *CD4* expression was plotted above the x-axis, and count of predicted immunogenic mutations below. No significant skew was observed ( $P = 6.9 \times 10^{-1}$ ).

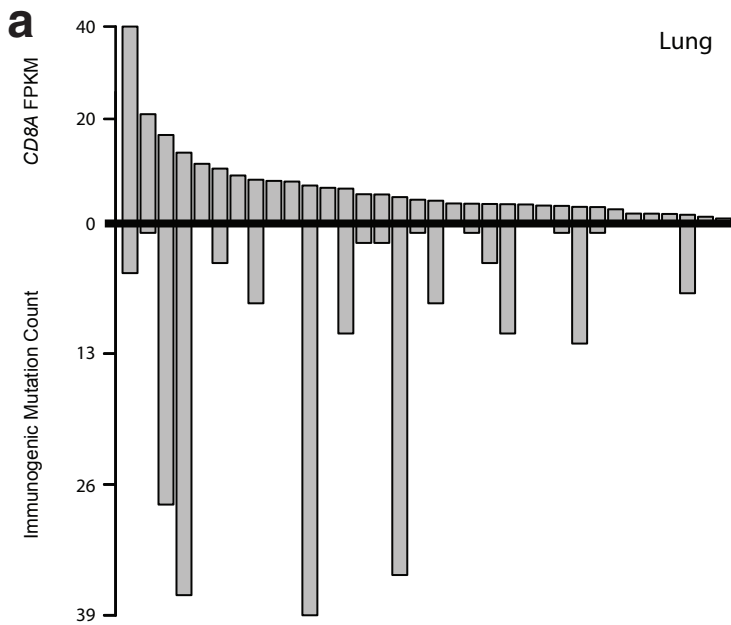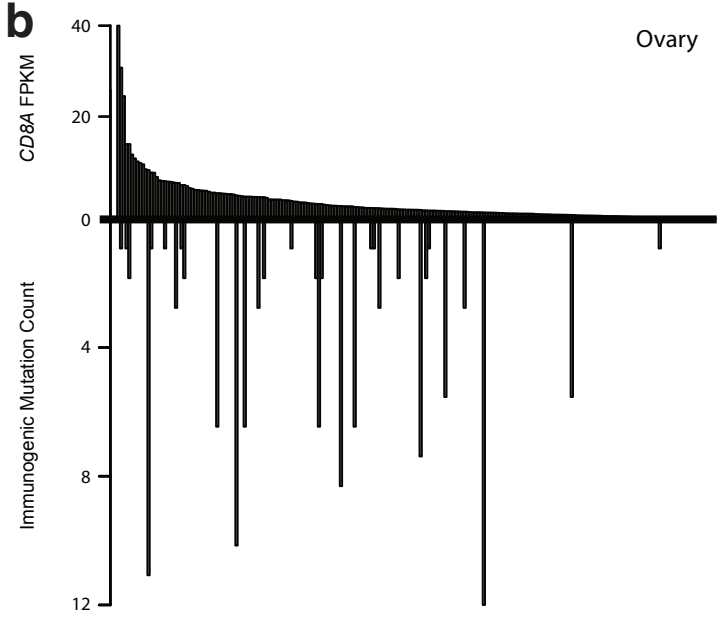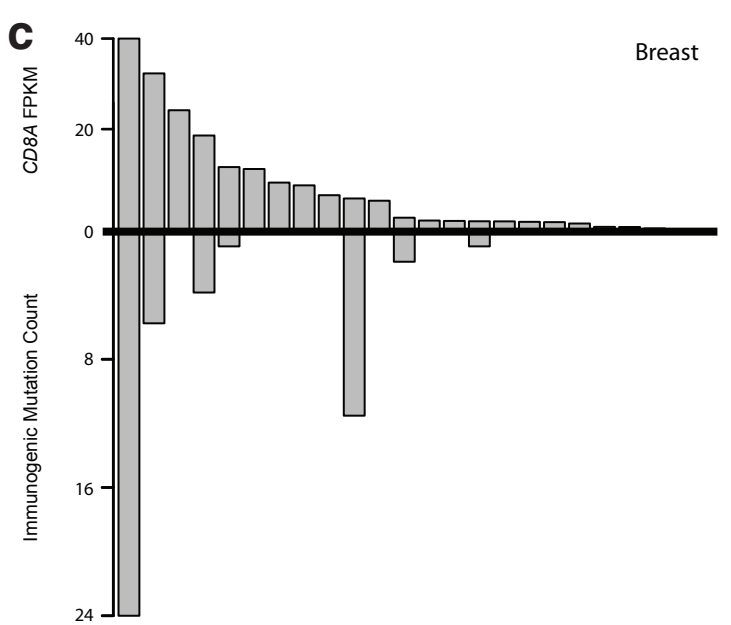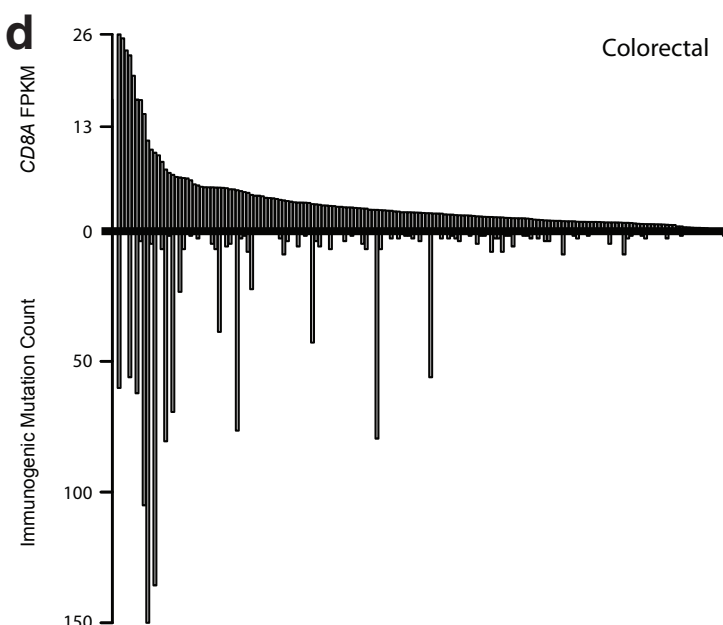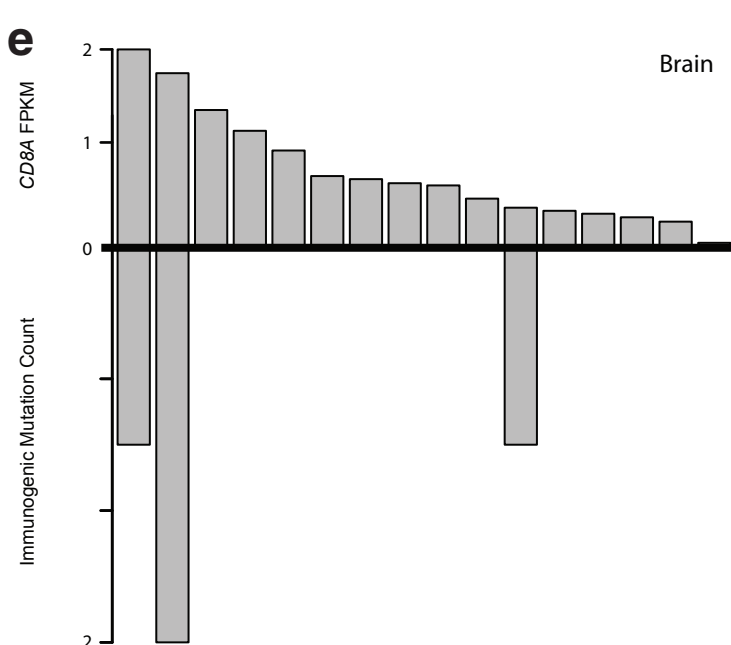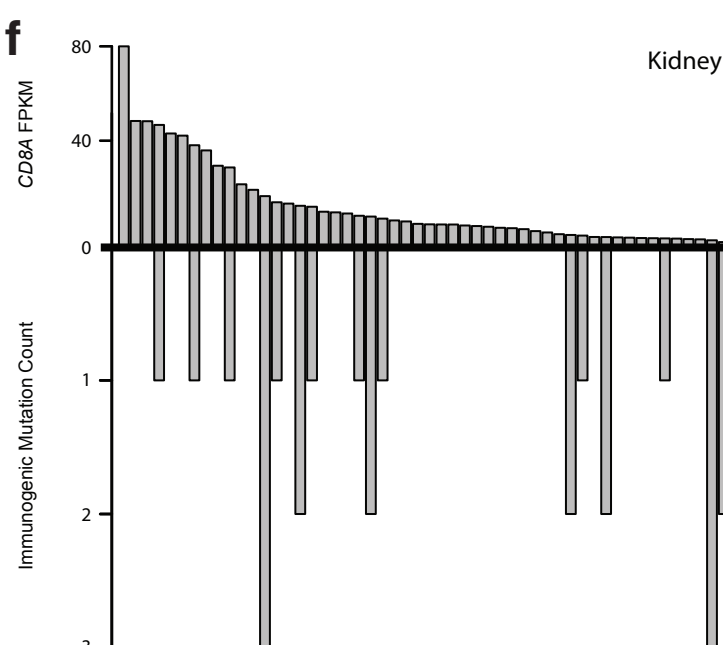

**Supplementary Figure 2** Skew plots for each cancer type individually. Patients were ordered along the x-axis according to their *CD8A* expression. Each patient's *CD8A* expression was plotted above the x-axis, and count of predicted immunogenic mutations below for **(a)** lung ( $P = 2.6 \times 10^{-2}$ ), **(b)** ovary ( $P = 4.8 \times 10^{-2}$ ), **(c)** breast ( $P = 1.9 \times 10^{-2}$ ), **(d)** colorectal ( $P = 1.0 \times 10^{-4}$ ), **(e)** brain ( $P = 2.7 \times 10^{-1}$ ) and **(f)** kidney ( $P = 2.9 \times 10^{-1}$ ).
